# Supplementary material for: Factors Associated with Healthcare Workers’ (HCWs) Acceptance of COVID-19 Vaccinations and Indications of a Role Model towards Population Vaccinations from a Cross-Sectional Survey in Greece, May 2021
Source: MDPI journal article supplement (doi:10.3390/ijerph181910558), 2021-10-08
Supplement: s1 [file s1]

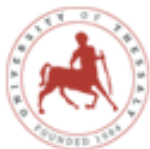

UNIVERSITY OF THESSALY  
SCHOOL OF HEALTH SCIENCES  
FACULTY OF MEDICINE

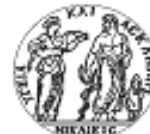

DEPARTMENT OF HYGIENE & EPIDEMIOLOGY

## ***QUESTIONNAIRE ON KNOWLEDGE, ATTITUDES AND PRACTICES OF HEALTH CARE PROFESSIONALS RELATED TO THE SARS-CoV-2 VACCINE***

### **GENERAL SECTION**

**1. Age:** ..... years

**2. Gender:**   ▪ Male           ▪ Female

**3. Marital status (indicate with 'X'):**   ▪ Married       ▪ Unmarried   ▪ Other (please specify).....

**4. Education level (indicate with 'X'):**

- High school
- Technological Educational Institute (TEI)
- Institute of Vocational Training (IEK)
- Higher Education Institute/University (AEI)
- Master /Doctoral

**5. Health care profession (indicate with 'X'):**

- Doctor (please indicate specialization .....)
- Medical Laboratory worker
- Nurse
- Other (please specify).....

**6. Sector of employment (indicate with 'X'):**

- Private hospital
- Public hospital
- Health centre (K.Y.)
- Community-based primary health unit (To. M.Y)

**7. Health District (Υ.ΠΕ) of employment:** .....

**8. Regional Unit of employment:** .....

**9. Department of employment (indicate with 'X'):** (please do not respond if you work at a health centre or community-based primary health unit)

- Clinical
- Laboratory
- Other (please specify).....

**10. Section of employment (indicate with 'X'):** (please do not respond if you work at a health centre or community-based primary health unit)

- Pathology
- Surgery
- Laboratory
- Other (please specify).....

**11. Years of practice:** .....

### **PART A**

**12. Do you belong to a vulnerable/high risk group due to your medical history? (indicate with 'X'):**

(cardiovascular disease, respiratory disease, diabetes, immunosuppression, cancer, pregnancy etc.)

- YES
- NO

**13. Do you live with older individuals or individuals belonging to a vulnerable/high risk group due to their medical history? (indicate with 'X'):**

(cardiovascular disease, respiratory disease, diabetes, immunosuppression, cancer, pregnancy etc.)

- YES
- NO

**14. Please circle the choice that best indicates your response.**

|                                                                                                     | <b>Completel<br/>y agree</b> | <b>Agree</b> | <b>Neither agree nor<br/>disagree</b> | <b>Disagree</b> | <b>Completel<br/>y disagree</b> |
|-----------------------------------------------------------------------------------------------------|------------------------------|--------------|---------------------------------------|-----------------|---------------------------------|
| The HPV vaccine is recommended for all males up to 18 years of age in the country.                  | 1                            | 2            | <b>3</b>                              | 4               | 5                               |
| After the flu vaccination, certain foods are not permitted to be consumed for a period of 24 hours. | 1                            | 2            | <b>3</b>                              | 4               | 5                               |
| One of the contraindications of the flu vaccine is an allergy to eggs.                              | 1                            | 2            | <b>3</b>                              | 4               | 5                               |

**15. Please circle the choice that best indicates your response.**

|                                                                                                                                                   | <b>Completel<br/>y agree</b> | <b>Agree</b> | <b>Neither agree nor<br/>disagree</b> | <b>Disagree</b> | <b>Completel<br/>y disagree</b> |
|---------------------------------------------------------------------------------------------------------------------------------------------------|------------------------------|--------------|---------------------------------------|-----------------|---------------------------------|
| Vaccinations are an important tool for the protection of public health and in particular of health professionals and workers in the health sector | 1                            | 2            | <b>3</b>                              | 4               | 5                               |
| Natural immunity acquired via disease is always preferable to immunity acquired via vaccination.                                                  | 1                            | 2            | <b>3</b>                              | 4               | 5                               |
| Many vaccines often have serious side effects.                                                                                                    | 1                            | 2            | <b>3</b>                              | 4               | 5                               |

**16. Are you the parent/guardian of one or more children? (indicate with 'X'):**

- YES
- NO

If **YES**, do you adhere to the child vaccination program suggested by the National Vaccination Program in the country? (please circle the answer of your choice)

- YES, I vaccinate my children according to the National Vaccination Program
- I select and carry out some vaccinations
- I do not vaccinate my children

**17. Have you been vaccinated with the seasonal flu vaccine? (indicate with 'X'):**

- YES
- NO

**If not, please indicate why** (more than one response can be selected)

- I do not have time
- I use homeopathic remedies
- Fear regarding vaccine safety
- Apathetic
- I do not think I am at risk
- Other (please specify).....

**PART B**

**18. Do you know of a relative or friend who has had COVID-19? (indicate with 'X'):**

- YES
- NO

**19. Do you come into contact with COVID-19 patients while performing your job duties? (indicate with 'X'):**

- YES      • NO

**20. How do you evaluate your level of being informed about vaccines against the SARS-CoV-2 virus that causes COVID-19? (Please circle below the option which best represents your answer)**

**Πώς κρίνετε την ενημέρωσή σας για τα εμβόλια έναντι του ιού SARS-CoV-2 που προκαλεί τη νόσο COVID-19; (κυκλώστε την απάντηση που σας αντιπροσωπεύει)**

| No information | Insufficient | Satisfactory | Excellent |
|----------------|--------------|--------------|-----------|
| 1              | 2            | 3            | 4         |

**21. Which channels do you use to keep informed about the COVID-19 pandemic and the SARS-CoV-2 vaccine, and how often? (please circle the option that represents your answer)**

|                                                                          | Alwa<br>ys | Often | Rarely | Nev<br>er |
|--------------------------------------------------------------------------|------------|-------|--------|-----------|
| Television                                                               | 1          | 2     | 3      | 4         |
| Social media channels (Facebook, Twitter, Instagram etc.)                | 1          | 2     | 3      | 4         |
| Newspaper (in print or electronic versions)                              | 1          | 2     | 3      | 4         |
| General interest publications/journals (in print or electronic versions) | 1          | 2     | 3      | 4         |
| Medical articles in journals (in print or electronic versions)           | 1          | 2     | 3      | 4         |
| Committee for infectious diseases at health facility                     | 1          | 2     | 3      | 4         |
| General interest websites                                                | 1          | 2     | 3      | 4         |
| Website of the Hellenic National Public Health Organization (NPHO)       | 1          | 2     | 3      | 4         |
| Website of the Hellenic Ministry of Health                               | 1          | 2     | 3      | 4         |
| Please specify other<br>.....                                            | 1          | 2     | 3      | 4         |

**22. Please circle the response below that represents your answer.**

|                                                                                                                 | Completel<br>y agree | Agree | Neither agree<br>nor disagree | Disagree | Completel<br>y disagree |
|-----------------------------------------------------------------------------------------------------------------|----------------------|-------|-------------------------------|----------|-------------------------|
| Some of the vaccines against SARS-CoV-2 which are approved and used in the country are based on mRNA technology | 1                    | 2     | 3                             | 4        | 5                       |
| The dosage regimen of the vaccines against SARS-CoV-2 includes 3 doses                                          | 1                    | 2     | 3                             | 4        | 5                       |
| There is evidence that mRNA technology interferes with the DNA of cells                                         | 1                    | 2     | 3                             | 4        | 5                       |

**23. Have you been or will you be vaccinated with any of the vaccines against the SARS-CoV-2 virus which causes COVID-19, which have received the necessary approvals from the European Medicines Agency and the National Medicines Agency? (indicate with 'X'):**

- YES      • NO

**If not, please indicate why (indicate with 'X')** (more than one response can be selected)

- I do not have time
- Apathetic
- Fear regarding vaccine safety
- I do not think I am at risk
- I need further information in order to make a decision

Other (please specify) .....

**24. Does the short period of time for development of the vaccines cause you any concerns about its safety?  
(circle the option below that represents your answer)**

| Completely agree | Agree    | Neither agree nor disagree | Disagree | Completely disagree |
|------------------|----------|----------------------------|----------|---------------------|
| <b>1</b>         | <b>2</b> | <b>3</b>                   | <b>4</b> | <b>5</b>            |

**25. Do you believe that vaccination against SARS-CoV-2 should be mandatory for healthcare professionals?  
(indicate with 'X'):**

- YES
- NO

**THANK YOU FOR YOUR TIME**
